# Supplementary material for: Four in One: Cryptic Diversity in Geoffroy’s Side-Necked Turtle Phrynops geoffroanus (Schweigger 1812) (Testudines: Pleurodira: Chelidae) in Brazil
Source: MDPI journal article supplement (doi:10.3390/d14050360), 2022-05-03
Supplement: s1 [file s1]

## SUPPORTING INFORMATION

### For in One: Cryptic Diversity in the Geoffroy's Side-Necked Turtle *Phrynops geoffroanus* (Schweigger 1812) (Testudines: Pleurodira: Chelidae)

#### SAMPLING AND SOURCE OF DNA

**Supplementary Table S1.** List of genetic sample of *Phrynops geoffroanus* taxa used in this study, with localities, country, basins, geographic coordinates, genbank access, museum voucher (see Methods).

| Lineage | Sample                | Locality, Country                                               | Basins | lat         | long        | 16S      | CYTB     | COI      | Voucher number |
|---------|-----------------------|-----------------------------------------------------------------|--------|-------------|-------------|----------|----------|----------|----------------|
| L1      | <i>P. geoffroanus</i> | Anhanduinzinho stream, Campo Grande, Mato Grosso do Sul, Brazil | Parana | -20.757239° | -54.384169° | ON063157 | ON061168 | ON063068 | INPA-H 27634   |
| L1      | <i>P. geoffroanus</i> | Anhanduinzinho stream, Campo Grande, Mato Grosso do Sul, Brazil | Parana | -20.757239° | -54.384169° | ON063154 | ON061165 | ON063065 | INPA-H 27623   |
| L1      | <i>P. geoffroanus</i> | Anhanduinzinho stream, Campo Grande, Mato Grosso do Sul, Brazil | Parana | -20.757239° | -54.384169° | ON063156 | ON061167 | ON063067 | INPA-H 27230   |
| L1      | <i>P. geoffroanus</i> | Anhanduinzinho stream, Campo Grande, Mato Grosso do Sul, Brazil | Parana | -20.757239° | -54.384169° | ON063155 | ON061166 | ON063066 | INPA-H 27629   |
| L1      | <i>P. geoffroanus</i> | Uberabinha River, Uberaba, Minas Gerais, Brazil                 | Parana | -18.907083° | -48.307798° | ON063146 | ON061130 | ON063057 | INPA-H 27592   |
| L1      | <i>P. geoffroanus</i> | Uberabinha River, Uberaba, Minas Gerais, Brazil                 | Parana | -18.907083° | -48.307798° | ON063145 | ON061129 | ON063056 | INPA-H 27591   |
| L1      | <i>P. geoffroanus</i> | Uberabinha River, Uberaba, Minas Gerais, Brazil                 | Parana | -18.907083° | -48.307798° | ON063147 | ON061131 | ON063058 | INPA-H 27593   |
| L1      | <i>P. geoffroanus</i> | Uberabinha River, Uberaba, Minas Gerais, Brazil                 | Parana | -18.907083° | -48.307798° | ON063149 | ON061134 | ON063061 | INPA-H 27604   |
| L1      | <i>P. geoffroanus</i> | Uberabinha River, Uberaba, Minas Gerais, Brazil                 | Parana | -18.907083° | -48.307798° | ON063150 | ON061133 | ON063060 | INPA-H 27601   |
| L1      | <i>P. geoffroanus</i> | Uberabinha River, Uberaba, Minas Gerais, Brazil                 | Parana | -18.907083° | -48.307798° | ON063148 | ON061132 | ON063059 | INPA-H 27600   |
| L1      | <i>P. geoffroanus</i> | Lindóia River, Londrina, Paraná, Brazil                         | Parana | -23.284493° | -51.109415° | ON063177 | ON061171 | ON063088 | INPA-H 29054   |
| L1      | <i>P. geoffroanus</i> | Lindóia River, Londrina, Paraná, Brazil                         | Parana | -23.284493° | -51.109415° | ON063175 | ON061169 | ON063087 | INPA-H 29045   |

|    |                       |                                                      |                    |             |             |          |          |          |              |
|----|-----------------------|------------------------------------------------------|--------------------|-------------|-------------|----------|----------|----------|--------------|
| L1 | <i>P. geoffroanus</i> | Lindóia River, Londrina, Paraná, Brazil              | Paraná             | -23.284493° | -51.109415° | ON063176 | ON061170 | ON063086 | INPA-H 29051 |
| L1 | <i>P. geoffroanus</i> | Green Lake, Tapajós River, Santarém, Pará, Brazil    | Amazonas           | -2.509800°  | -54.932759° | ON063184 | ON061154 | ON063100 | INPA-H 33842 |
| L1 | <i>P. geoffroanus</i> | Green Lake, Tapajós River, Santarém, Pará, Brazil    | Amazonas           | -2.509800°  | -54.932759° | ON063183 | ON061153 | ON063099 | INPA-H 33841 |
| L1 | <i>P. geoffroanus</i> | Taquaruçuzinho River, Tocantins, Brazil              | Amazonas           | -10.310822° | -48.150442° | ON063201 | ON061152 | ON063112 | INPA-H 34889 |
| L1 | <i>P. geoffroanus</i> | Paranoá Lake, Brasília, Distrito Federal, Brazil     | Parana             | -15.776779° | -47.858755° | ON063151 | ON061135 | ON063062 | INPA-H 27606 |
| L1 | <i>P. geoffroanus</i> | Paranoá Lake, Brasília, Distrito Federal, Brazil     | Parana             | -15.776779° | -47.858755° | ON063153 | ON061137 | ON063064 | INPA-H 27619 |
| L1 | <i>P. geoffroanus</i> | Paranoá Lake, Brasília, Distrito Federal, Brazil     | Parana             | -15.776779° | -47.858755° | ON063152 | ON061136 | ON063063 | INPA-H 27618 |
| L1 | <i>P. geoffroanus</i> | Piracicaba River, Piracicaba, São Paulo, Brazil      | Parana             | -22.679111° | -47.540663° | ON063142 | ON061158 | ON063053 | INPA-H 26126 |
| L1 | <i>P. geoffroanus</i> | Piracicaba River, Piracicaba, São Paulo, Brazil      | Parana             | -22.679111° | -47.540663° | ON063141 | ON061157 | ON063052 | INPA-H 26125 |
| L1 | <i>P. geoffroanus</i> | Piracicaba River, Piracicaba, São Paulo, Brazil      | Parana             | -22.679111° | -47.540663° | ON063140 | ON061156 | ON063051 | INPA-H 26124 |
| L1 | <i>P. geoffroanus</i> | Piracicaba River, Piracicaba, São Paulo, Brazil      | Parana             | -22.679111° | -47.540663° | ON063139 | ON061155 | ON063050 | INPA-H 26122 |
| L1 | <i>P. geoffroanus</i> | Piracicaba River, Piracicaba, São Paulo, Brazil      | Parana             | -22.679111° | -47.540663° | ON063143 | ON061159 | ON063054 | INPA-H 26127 |
| L1 | <i>P. geoffroanus</i> | Piracicaba River, Piracicaba, São Paulo, Brazil      | Parana             | -22.679111° | -47.540663° | ON063144 | ON061160 | ON063055 | INPA-H 26134 |
| L1 | <i>P. geoffroanus</i> | Piracicaba River, Anhembi, São Paulo, Brazil         | Parana             | -22.614889° | -48.037386° | ON063188 | ON061164 | ON063107 | INPA-H 34303 |
| L1 | <i>P. geoffroanus</i> | Aguapeí River, Castilho, São Paulo, Brazil           | Parana             | -21.064909° | -51.745594° | ON063185 | ON061162 | ON063105 | INPA-H 34291 |
| L1 | <i>P. geoffroanus</i> | Aguapeí River, Castilho, São Paulo, Brazil           | Parana             | -21.064909° | -51.745594° | ON063186 | ON061163 | ON063106 | INPA-H 34292 |
| L1 | <i>P. geoffroanus</i> | Aguapeí River, Castilho, São Paulo, Brazil           | Parana             | -21.064909° | -51.745594° | ON063187 | ON061161 | ON063101 | INPA-H 34254 |
| L1 | <i>P. geoffroanus</i> | Araguaia River, Barra do Garças, Mato Grosso, Brazil | Araguaia/Tocantins | -15.696112° | -52.131174° | ON063190 | ON061146 | ON063103 | INPA-H 34258 |
| L1 | <i>P. geoffroanus</i> | Araguaia River, Barra do Garças, Mato Grosso, Brazil | Araguaia/Tocantins | -15.696112° | -52.131174° | ON063189 | ON061145 | ON063102 | INPA-H 34257 |
| L1 | <i>P. geoffroanus</i> | São Gonçalo River, Cuiabá, Mato Grosso, Brazil       | Paraguay           | -15.645573° | -56.066384° | ON063191 | ON061147 | ON063104 | INPA-H 34260 |

|    |                       |                                                     |                      |             |             |          |          |          |              |
|----|-----------------------|-----------------------------------------------------|----------------------|-------------|-------------|----------|----------|----------|--------------|
| L1 | <i>P. geoffroanus</i> | São Gonçalo River, Cuiabá, Mato Grosso, Brazil      | Paraguay             | -15.645573° | -56.066384° | ON063193 | ON061141 | ON063090 | INPA-H 30417 |
| L1 | <i>P. geoffroanus</i> | São Gonçalo River, Cuiabá, Mato Grosso, Brazil      | Paraguay             | -15.645573° | -56.066384° | ON063192 | ON061140 | ON063089 | INPA-H 30416 |
| L1 | <i>P. geoffroanus</i> | Camarinha River, Porto Estrela, Mato Grosso, Brazil | Paraguay             | -15.998708° | -57.419831° | ON063195 | ON061143 | ON063092 | INPA-H 30422 |
| L1 | <i>P. geoffroanus</i> | Camarinha River, Porto Estrela, Mato Grosso, Brazil | Paraguay             | -15.998708° | -57.419831° | ON063196 | ON061144 | ON063093 | INPA-H 30423 |
| L1 | <i>P. geoffroanus</i> | Camarinha River, Porto Estrela, Mato Grosso, Brazil | Paraguay             | -15.998708° | -56.683485° | ON063194 | ON061142 | ON063091 | INPA-H 30420 |
| L1 | <i>P. geoffroanus</i> | UHE Yacyretá, Corrientes, Argentina                 | Parana               | -27.454583° | -57.419831° | ON063206 | ON061172 | ON063117 | MLPDB 5283   |
| L1 | <i>P. geoffroanus</i> | UHE Yacyretá, Corrientes, Argentina                 | Parana               | -27.454583° | -57.419831° | ON063207 | ON061173 | ON063118 | MLPDB 6495   |
| L2 | <i>P. geoffroanus</i> | Aripuanã River, Aripuanã, Mato Grosso, Brazil       | Amazonas             | -10.162786° | -59.448605° | ON063137 | ON061138 | ON063048 | INPA-H 34908 |
| L2 | <i>P. geoffroanus</i> | Aripuanã River, Aripuanã, Mato Grosso, Brazil       | Amazonas             | -10.162786° | -59.448605° | ON063138 | ON061139 | ON063049 | INPA H 34909 |
| L2 | <i>P. geoffroanus</i> | Pirarara River, Cacoal, Rondônia, Brazil            | Amazonas             | -11.425813° | -61.467387° | ON063205 | ON061151 | ON063116 | INPA-H 34905 |
| L2 | <i>P. geoffroanus</i> | Pirarara River, Cacoal, Rondônia, Brazil            | Amazonas             | -11.425813° | -61.467387° | ON063203 | ON061149 | ON063114 | INPA-H 34901 |
| L2 | <i>P. geoffroanus</i> | Pirarara River, Cacoal, Rondônia, Brazil            | Amazonas             | -11.425813° | -61.467387° | ON063204 | ON061150 | ON063115 | INPA-H 34902 |
| L2 | <i>P. geoffroanus</i> | Machado River, Ji-Paraná, Rondônia, Brazil          | Amazonas             | -10.114157° | -61.912930° | ON063202 | ON061148 | ON063113 | INPA-H 34345 |
| L3 | <i>P. geoffroanus</i> | Itans Lake, Caicó, Rio Grande do Norte, Brazil      | Notheastern Atlantic | -6.491912°  | -37.067279° | ON063174 | ON061115 | ON063085 | INPA-H 27996 |
| L3 | <i>P. geoffroanus</i> | Itans Lake, Caicó, Rio Grande do Norte, Brazil      | Notheastern Atlantic | -6.491912°  | -37.067279° | ON063171 | ON061112 | ON063082 | INPA-H 27991 |
| L3 | <i>P. geoffroanus</i> | Itans Lake, Caicó, Rio Grande do Norte, Brazil      | Notheastern Atlantic | -6.491912°  | -37.067279° | ON063172 | ON061113 | ON063083 | INPA-H 27992 |
| L3 | <i>P. geoffroanus</i> | Itans Lake, Caicó, Rio Grande do Norte, Brazil      | Notheastern Atlantic | -6.491912°  | -37.067279° | ON063173 | ON061114 | ON063084 | INPA-H 27993 |
| L3 | <i>P. geoffroanus</i> | Itans Lake, Caicó, Rio Grande do Norte, Brazil      | Notheastern Atlantic | -6.491912°  | -37.067279° | ON063170 | ON061111 | ON063081 | INPA-H 27989 |
| L3 | <i>P. geoffroanus</i> | Formoso River, Tamandaré, Pernambuco, Brazil        | Notheastern Atlantic | -8.727634°  | -35.153122° | ON063158 | ON061125 | ON063069 | INPA-H 27794 |
| L3 | <i>P. geoffroanus</i> | Formoso River, Tamandaré, Pernambuco, Brazil        | Notheastern Atlantic | -8.727634°  | -35.153122° | ON063161 | ON061128 | ON063072 | INPA-H 27803 |

|    |                       |                                                   |                       |             |             |          |          |          |              |
|----|-----------------------|---------------------------------------------------|-----------------------|-------------|-------------|----------|----------|----------|--------------|
| L3 | <i>P. geoffroanus</i> | Formoso River, Tamandaré, Pernambuco, Brazil      | Notheastern Atlantic  | -8.727634°  | -35.153122° | ON063159 | ON061126 | ON063070 | INPA-H 27796 |
| L3 | <i>P. geoffroanus</i> | Formoso River, Tamandaré, Pernambuco, Brazil      | Notheastern Atlantic  | -8.727634°  | -35.153122° | ON063160 | ON061127 | ON063071 | INPA-H 27802 |
| L3 | <i>P. geoffroanus</i> | Carinhanha River, Carinhanha, Bahia, Brazil       | São Francisco         | -14.319964° | -43.487613° | ON063200 | ON061124 | ON063111 | INPA-H 34883 |
| L3 | <i>P. geoffroanus</i> | Carinhanha River, Carinhanha, Bahia, Brazil       | São Francisco         | -14.319964° | -43.487613° | ON063198 | ON061121 | ON063108 | INPA-H 34879 |
| L3 | <i>P. geoffroanus</i> | Carinhanha River, Carinhanha, Bahia, Brazil       | São Francisco         | -14.319964° | -43.487613° | ON063199 | ON061123 | ON063110 | INPA-H 34882 |
| L3 | <i>P. geoffroanus</i> | Carinhanha River, Carinhanha, Bahia, Brazil       | São Francisco         | -14.319964° | -43.487613° | ON063197 | ON061122 | ON063109 | INPA-H 34880 |
| L3 | <i>P. geoffroanus</i> | Brigida River, Ouricuri, Pernambuco, Brazil       | São Francisco         | -8.130546°  | -40.083797° | ON063182 | ON061120 | ON063098 | URCA 828     |
| L3 | <i>P. geoffroanus</i> | Palmeiras River, Juazeiro do Norte, Ceará, Brazil | São Francisco         | -7.134734°  | -30.314594° | ON063180 | ON061118 | ON063096 | INPA-H 30530 |
| L3 | <i>P. geoffroanus</i> | Palmeiras River, Juazeiro do Norte, Ceará, Brazil | São Francisco         | -7.134734°  | -30.314594° | ON063181 | ON061119 | ON063097 | INPA-H 30531 |
| L3 | <i>P. geoffroanus</i> | Palmeiras River, Juazeiro do Norte, Ceará, Brazil | São Francisco         | -7.134734°  | -30.314594° | ON063178 | ON061116 | ON063094 | INPA-H 30527 |
| L3 | <i>P. geoffroanus</i> | Palmeiras River, Juazeiro do Norte, Ceará, Brazil | São Francisco         | -7.134734°  | -30.314594° | ON063179 | ON061117 | ON063095 | INPA-H 30529 |
| L4 | <i>P. geoffroanus</i> | Manhuaçu River, Caratinga, Minas Gerais, Brazil   | Southeastern Atlantic | -19.725810° | -41.802147° | ON063167 | ON061108 | ON063078 | INPA-H 27813 |
| L4 | <i>P. geoffroanus</i> | Manhuaçu River, Caratinga, Minas Gerais, Brazil   | Southeastern Atlantic | -19.725810° | -41.802147° | ON063164 | ON061105 | ON063075 | INPA-H 27809 |
| L4 | <i>P. geoffroanus</i> | Manhuaçu River, Caratinga, Minas Gerais, Brazil   | Southeastern Atlantic | -19.725810° | -41.802147° | ON063169 | ON061110 | ON063079 | INPA-H 27815 |
| L4 | <i>P. geoffroanus</i> | Manhuaçu River, Caratinga, Minas Gerais, Brazil   | Southeastern Atlantic | -19.725810° | -41.802147° | ON063166 | ON061107 | ON063077 | INPA-H 27811 |
| L4 | <i>P. geoffroanus</i> | Manhuaçu River, Caratinga, Minas Gerais, Brazil   | Southeastern Atlantic | -19.725810° | -41.802147° | ON063162 | ON061103 | ON063073 | INPA-H 27804 |
| L4 | <i>P. geoffroanus</i> | Manhuaçu River, Caratinga, Minas Gerais, Brazil   | Southeastern Atlantic | -19.725810° | -41.802147° | ON063163 | ON061104 | ON063074 | INPA-H 27806 |
| L4 | <i>P. geoffroanus</i> | Manhuaçu River, Caratinga, Minas Gerais, Brazil   | Southeastern Atlantic | -19.725810° | -41.802147° | ON063165 | ON061106 | ON063076 | INPA-H 27810 |
| L4 | <i>P. geoffroanus</i> | Manhuaçu River, Caratinga, Minas Gerais, Brazil   | Southeastern Atlantic | -19.725810° | -41.802147° | ON063168 | ON061109 | ON063080 | INPA-H 27814 |
